# Supplementary material for: Onco-Regulon: an integrated database and software suite for site specific targeting of transcription factors of cancer genes
Source: Oxford University Press journal article supplement (doi:10.1093/database/baw116), 2016-01-01

## Supplementary Information

### Supplementary Table S1

This table presents 47 genes which have been shown to have role in breast cancer onset/progression were fished out from the database along with their known regulator. The binding sequence of each regulator was used as input for USP. The last column shows the unique sequence predicted by USP. E.g. Akt2 gene is regulated by MyoD, CREB, NFkB and AP1 transcription factors. Their binding sequences, along with the starting position of the motif, are given which was used as input for USP. MyoD binding motif in Akt2 gene is 11bp long while the unique sequence predicted for it is 17bp long. The number at the end of the sequence indicates the length of the unique sequence.

Smallest unique sequence in the following list is 13nt long for E2F transcription factor binding site in the promoter of Wnt10B gene.

|   | Gene | TranscriptionFactor | Chr. No | Starting Position | Binding Sequence | Length | Unique Sequence    |
|---|------|---------------------|---------|-------------------|------------------|--------|--------------------|
| 1 | AKT2 | MyoD                | chr19   | 40791913          | ATGCCACCTGC      | 11     | TATTAATGCCACCTGC   |
|   | AKT2 | CREB                | chr19   | 40796835          | TGGACTGCGGT      | 11     | CGCAGGCTGGACTGCGGT |
|   | AKT2 | NF-kappaB1          | chr19   | 40790600          | CAGGGCTCCC       | 10     | CAGGGCTCCCCCAACG   |
|   | AKT2 | AP-1                | chr19   | 40788299          | GCTGTGTCAC       | 10     | GTAGCTGTGTCACCCC   |
|   | AKT2 | AP-1                | chr19   | 40788585          | GGGGCTCAGTG      | 11     | CTAGGGGCTCAGTGACC  |

|   |         |             |       |           |               |    |                                              |
|---|---------|-------------|-------|-----------|---------------|----|----------------------------------------------|
| 2 | APC     | c-Myc       | chr05 | 112072476 | TGGCACGTGCCT  | 12 | ACTTAGCTGGGCATGATGGCACGTGCCTGTAGTCCCAGCTACTT |
|   | APC     | HNF-4alpha1 | chr05 | 112071326 | TGAAATTTGGCCC | 13 | ATGCTGAAATTTGGCCC                            |
|   | APC     | C/EBPbeta   | chr05 | 112057062 | GATTGCGCCACT  | 12 | GATTGCGCCACTACACTCTAGCCTT                    |
|   | APC     | C/EBPbeta   | chr05 | 112081881 | AGATGAAGAAATC | 13 | CAAGATGGAGAAAGCAT                            |
| 3 | ATM     | Sp1         | chr11 | 108083718 | TGGGCGGGGC    | 10 | AACCTCCCTGGGCGGGGC                           |
|   | ATM     | CREB        | chr11 | 108079770 | GCTGAGGCAGGC  | 12 | GCTGAGGCAGGCAGATCACCTGAGGTCAAGAGTTTGAGG      |
|   | ATM     | p53         | chr11 | 108139192 | AGACATGCTC    | 10 | AGACATGCTCAAGTTCT                            |
|   | ATM     | AP-1        | chr11 | 108138314 | GGTGGCTCAC    | 10 | TAAAACCAGGCCAGGCATGGTGGCTCAC                 |
|   | ATM     | c-Jun       | chr11 | 108091071 | GGTGACACAG    | 10 | GGTGACACAGAACATAAG                           |
| 4 | BCL2    | NF-kappaB1  | chr18 | 60980154  | GGGAAGTCCC    | 10 | TTAACAAGGGAAGTCCC                            |
|   | BCL2    | p53         | chr18 | 60992888  | ATCTGTACAG    | 10 | CGCATCTGTACAGACC                             |
|   | BCL2    | CREB        | chr18 | 60985408  | CCGGTTGACGCTC | 13 | CCGGTTGACGCTCTC                              |
|   | BCL2    | AP-2alphaA  | chr18 | 60987120  | CCGCCTCCGGGCT | 13 | CCGCCTCCGGGCTGCG                             |
|   | BCL2    | C/EBPalpha  | chr18 | 60988190  | TTTTAAGCAATG  | 12 | CACGTTTTAAGCAATG                             |
| 5 | BRCA1   | Sp1         | chr17 | 41269521  | GCCGAGGCGGGC  | 12 | TTGTAATCCCAGCACTTGGGAGGCCGAGGCGGGC           |
|   | BRCA1   | Bach1       | chr17 | 41269056  | ATGGTACTGTGTA | 13 | CTGGCAAGAACTTTACAGATGGTACTGTGTA              |
|   | BRCA1   | p53         | chr17 | 41275932  | TAGACATGTC    | 10 | ATCTTACTAGACATGTC                            |
|   | BRCA1   | c-Jun       | chr17 | 41271815  | CACTGACTCAAT  | 12 | CACTGACTCAATTCTGAAAC                         |
|   | BRCA1   | AP-1        | chr17 | 41274786  | GGACGCAGTG    | 10 | GAATGGCTGGACGCAGTG                           |
| 6 | BRCA2   | p53         | chr13 | 32875134  | AGGGATGCCC    | 10 | AGGGATGCCCTACCCCT                            |
|   | BRCA2   | NF-kappaB1  | chr13 | 32883640  | TGTGCAATTCCT  | 13 | TGTGCAATTCCTGTGC                             |
|   | BRCA2   | CREB        | chr13 | 32870704  | TGTGATGTAAGC  | 12 | TTTTGTGATGTAAGCTTA                           |
|   | BRCA2   | CREB        | chr13 | 32889189  | GTGAAGTCATC   | 11 | GTGAAGTCATCCACAA                             |
|   | BRCA2   | CREB        | chr13 | 32890087  | ATGACGCCATC   | 11 | AGATGACGCCATCTG                              |
| 7 | CCND1   | ATF-2       | chr11 | 69453024  | AGGTGACCCCACC | 13 | GCAGGTGACCCCACCTG                            |
|   | CCND1   | CRE-BP1     | chr11 | 69455864  | CAGTAACGTCACA | 13 | CAGTAACGTCACACG                              |
|   | CCND1   | NF-kappaB1  | chr11 | 69462837  | TGAGGAGCCCC   | 11 | TGAGGAGCCCCAACAAC                            |
|   | CCND1   | AP-1        | chr11 | 69436584  | AGTGGCTCAC    | 10 | CCACAGTGGCCAGGCACAGTGGCTCAC                  |
|   | CCND1   | STAT5A      | chr11 | 69455443  | CGTTCTTGAAAAT | 13 | GGCGTTCTTGAAAAT                              |
| 8 | COL18A1 | p53         | chr21 | 46884268  | AGGCAGGCCC    | 10 | ATAAGGCAGGCCCTCG                             |

|    |         |            |       |           |                     |    |                                                   |
|----|---------|------------|-------|-----------|---------------------|----|---------------------------------------------------|
|    | COL18A1 | ATF        | chr21 | 46830693  | GGGTGACGTGAGCT      | 14 | GGGTGACGTGAGCTGA                                  |
|    | COL18A1 | ATF        | chr21 | 46876206  | CCCTGACGTCCGCC      | 14 | CCCTGACGTCCGCCTG                                  |
|    | COL18A1 | NF-kappaB  | chr21 | 46826029  | TGGGGACCTTCCT       | 13 | CCCGTGGGGACCTTCCT                                 |
|    | COL18A1 | NF-kappaB1 | chr21 | 46808663  | AGGGAGGCCC          | 10 | AGGGAGGCCCCAGCAGGA                                |
| 9  | CTSD    | STAT1      | chr11 | 1777997   | ACCCTTTTCCCAGA      | 14 | GAGAACCCTTTTCCCAGA                                |
|    | CTSD    | STAT1beta  | chr11 | 1780035   | GGCCCATTTCCAGACC    | 14 | GGCCCATTTCCAGACC                                  |
|    | CTSD    | Egr-1      | chr11 | 1779947   | CCCTCCCCTC          | 11 | CCCTCCCCTCATTGTG                                  |
|    | CTSD    | Egr-1      | chr11 | 1799690   | ACCTCCCACCC         | 11 | CGCCTACCTCCCACCC                                  |
|    | CTSD    | c-Jun      | chr11 | 1779543   | GCTGTGTCAC          | 10 | GCTGTGTCACCATCCCG                                 |
| 10 | DCC     | p53        | chr18 | 49847510  | GAGCCTTCCTTGGCATTTC | 19 | GAGCCTTCCTTGGCATTTC                               |
|    | DCC     | p53        | chr18 | 49854093  | AGACATGTCT          | 10 | ATGCCAAGACATGTCT                                  |
|    | DCC     | p53        | chr18 | 49875230  | GAGCAAGTCCTGCCATGTT | 19 | GAGCAAGTCCTGCCATGTT                               |
|    | DCC     | Nkx6-1     | chr18 | 49849114  | AGTTTAAATTGTAT      | 14 | TCAAAAGTTTTAATTGTAT                               |
|    | DCC     | Nkx6-1     | chr18 | 49867987  | TTTCTAATTAAAAA      | 14 | TTTCTAATTAAAAATGGC                                |
| 11 | EGF     | c-Fos      | chr04 | 110814460 | TGTGACTCAG          | 10 | TGTGACTCAGCTAGAAGC                                |
|    | EGF     | CREB       | chr04 | 110816874 | TGAAGTCA            | 8  | TGAAGTCAGGTAGGGTGATGCCTCCAGCTTTGTTCTTTTGGCTTAGGAT |
|    | EGF     | CREB       | chr04 | 110820615 | GGTGACGTA           | 9  | GGTGACGTACAGATGGGTTTTTGGTGTGGATGGT                |
|    | EGF     | CREB       | chr04 | 110822464 | GGTGACGCA           | 9  | GGTGACGCAAAGACA                                   |
|    | EGF     | CREB       | chr04 | 110825186 | GGTGATGTC           | 9  | GGTGATGTCAGAGAGAA                                 |
|    | EGF     | CREB       | chr04 | 110834176 | GTGAAGTCAGC         | 11 | GTGAAGTCAGCCAGAGCA                                |
|    | EGF     | AP-1       | chr04 | 110814202 | ATTAGTCAG           | 9  | CAAATTTAAAAAATTAGTCAG                             |
|    | EGF     | AP-1       | chr04 | 110814460 | TGTGACTCAG          | 10 | TGTGACTCAGCTAGAAGC                                |
|    | EGF     | AP-1       | chr04 | 110827406 | AATGACTCA           | 9  | GAAAACTCTAATGACTCA                                |
|    | EGF     | AP-1       | chr04 | 110832909 | CCTGACTTA           | 9  | CCTGACTTAAGCTGTTT                                 |
|    | EGF     | AP-1       | chr04 | 110832774 | TCTGACTCA           | 9  | TCTGACTCAGTCCAGA                                  |
|    | EGF     | AP-1       | chr04 | 110836255 | GGTGGCTCAG          | 10 | CCACCTCTGGTGGCTCAG                                |
|    | EGF     | NF-kappaB1 | chr04 | 110820018 | TGGGGAAGTTCTC       | 13 | TGGGGAAGTTCTCTGGAAAATATCCTGCAGAGTGTTTTT           |
| 12 | EGFR    | AP-2alphaA | chr07 | 55072263  | GCCCCGCGC           | 9  | CTGTGAGCCCCGCGC                                   |
|    | EGFR    | c-Myc      | chr07 | 55072632  | GTGCCAGGTGCTG       | 13 | GCTTCTGTGCCAGGTGCTG                               |
|    | EGFR    | p53        | chr07 | 55083419  | AGGCATGCTC          | 10 | AGGCATGCTCCTGGTA                                  |

|    |       |             |       |           |                    |    |                             |
|----|-------|-------------|-------|-----------|--------------------|----|-----------------------------|
|    | EGFR  | Egr-1       | chr07 | 55087262  | GGCGGAGGAGG        | 11 | GCGGGCGGAGGAGGAGA           |
|    | EGFR  | c-Jun       | chr07 | 55095863  | ATGACGTCA          | 9  | ATGACGTCATGATTG             |
| 13 | ERBB2 | PPAR-gamma1 | chr17 | 37825107  | AGAGGGGCAGAGGAGA   | 16 | GAGAGGGGCAGAGGAGAG          |
|    | ERBB2 | p300        | chr17 | 37859823  | CTGAGGGAGTAAGAG    | 15 | CTGAGGGAGTAAGAGCT           |
|    | ERBB2 | p53         | chr17 | 37851371  | AGCCATGCCT         | 10 | AGCCATGCCTGCGCA             |
|    | ERBB2 | c-Myc       | chr17 | 37862772  | TTGGCATGTGGGT      | 13 | AGAGGTTGGCATGTGGGT          |
|    | ERBB2 | N-Myc       | chr17 | 37827240  | GCCACGTGCCC        | 11 | CCCCATGCCACGTGCCC           |
| 14 | ERBB3 | AP-1        | chr12 | 56473839  | CGTGACTCA          | 9  | CGCGGCCGTGACTCA             |
|    | ERBB3 | AP-1        | chr12 | 56476154  | AATGACTAAC         | 10 | AATGACTAACCTTCCT            |
|    | ERBB3 | c-Jun       | chr12 | 56480110  | GGTGACTGAG         | 10 | CTGGACAGGTGACTGAG           |
|    | ERBB3 | AP-2alpha   | chr12 | 56474037  | GGCCCCCGGGCC       | 12 | GGCCCCCGGGCCGGA             |
|    | ERBB3 | Hand1       | chr12 | 56477585  | CAATACCAGACACTGTA  | 17 | CAATACCAGACACTGTACA         |
| 15 | ESR1  | FOXO3       | chr06 | 152122328 | TCAAGTAAACAACAG    | 15 | CTCAAGTAAACAACAG            |
|    | ESR1  | p53         | chr06 | 152116354 | GGTCATGCCT         | 10 | AAGAGCTGGGTGTGGTGGGTCATGCCT |
|    | ESR1  | AhR         | chr06 | 152128883 | CCGCAGGCTCCCGGGGCA | 18 | CCCGCAGGCTCCCGGGGCA         |
|    | ESR1  | AP-1        | chr06 | 152121909 | AATGAGTCAT         | 10 | AATGAGTCATTCACTGGC          |
|    | ESR1  | GATA-3      | chr06 | 152128357 | GCCCTATCTC         | 10 | GCCCTATCTCGGTTA             |
| 16 | FGF3  | GATA-1      | chr11 | 69626980  | TCCCCATCTG         | 10 | TCCCCATCTGGGGTGTGG          |
|    | FGF3  | GATA-1      | chr11 | 69630599  | GCGCCATCCC         | 10 | TGGGCGCCATCCCCCT            |
|    | FGF3  | GATA-1      | chr11 | 69637299  | CAGCCCTATCT        | 11 | CCCCAGCCCTATCTGGT           |
|    | FGF3  | HOXA3       | chr11 | 69634226  | ACCAATTATG         | 10 | ACCAATTATGCCTCCG            |
|    | FGF3  | AP-2alphaA  | chr11 | 69632489  | CGCCCGGGG          | 9  | CGCTTCCTGCGCCCGGGG          |
|    | FGF3  | Sp1         | chr11 | 69590303  | GGACCCCGGCCC       | 12 | TGGAGGGACCCCGGCCC           |
|    | FGF3  | Sp1         | chr11 | 69590327  | CCGCCCCGGCCCA      | 12 | CCGCCCCGGCCACGGAC           |
|    | FGF3  | Sp1         | chr11 | 69590348  | TCGTCCCGCCCC       | 12 | TCGTCCCGCCCCCTG             |
|    | FGF3  | MyoD        | chr11 | 69588922  | GGGCAGGTGA         | 10 | GCGGGGCAGGTGATCC            |
|    | FGF3  | Tal-1       | chr11 | 69586801  | CTGTAACAGCTGTCTGC  | 17 | CTGTAACAGCTGTCTGC           |
| 17 | FGFR1 | Sp1         | chr08 | 38324406  | ACACCCACCCC        | 12 | ACACCCACCCCCCCCCC           |
|    | FGFR1 | Sp1         | chr08 | 38339815  | GTCCCTGCCT         | 10 | AGATCCCCTGTCCCTGCCT         |
|    | FGFR1 | CREB        | chr08 | 38318566  | GGGGCACATCTCAG     | 14 | AGGGGGCACATCTCAG            |

|    |       |             |       |           |                   |    |                                  |
|----|-------|-------------|-------|-----------|-------------------|----|----------------------------------|
|    | FGFR1 | CREB        | chr08 | 38324839  | TTTGGTGACGACA     | 13 | CCATTTGGTGACGACA                 |
|    | FGFR1 | CREB        | chr08 | 38339242  | TGGAGTGCAGTG      | 12 | GTCACCAGGATGGAGTGCAGTGGTGCGATCTT |
| 18 | FGFR2 | E2F-2       | chr10 | 123356334 | GGCGCTAA          | 9  | GGCGCTAAAGAGCTC                  |
|    | FGFR2 | Sox9        | chr10 | 123361710 | TGGGTAACAAGA      | 12 | CGCCTGGGTAACAAGAGAGA             |
|    | FGFR2 | Sox9        | chr10 | 123368265 | GCCCTTTGTTCT      | 12 | GCCCTTTGTTCTCCGG                 |
|    | FGFR2 | Sox5        | chr10 | 123349798 | GTCAACAATGA       | 11 | CATTAATGTCAACAATGA               |
|    | FGFR2 | Sox5        | chr10 | 123351358 | TCCAACAATAC       | 11 | CTGCTTCCAACAATAC                 |
| 19 | FGFR4 | Ik-3        | chr05 | 176517990 | CTGCGGGGAACACC    | 14 | CTGCGGGGAACACCGT                 |
|    | FGFR4 | COUP-TF1    | chr05 | 176524543 | CTGACCTTCGGACCC   | 15 | CTGACCTTCGGACCCTA                |
|    | FGFR4 | HNF-1A      | chr05 | 176514211 | CGGTAAATCAGTAACC  | 16 | CGGTAAATCAGTAACC                 |
|    | FGFR4 |             | chr05 | 176514286 | TGGTTACTCATTGCCC  | 16 | TGGTTACTCATTGCCC                 |
|    | FGFR4 | POU3F2      | chr05 | 176516184 | AATCAATTCATTTAT   | 15 | GCAATCAATTCATTTAT                |
|    | FGFR4 | ZID         | chr05 | 176517610 | GAGGCTCCATGATC    | 14 | GAGGCTCCATGATCG                  |
|    | FGFR4 | HNF-4alpha2 | chr05 | 176524543 | CTGACCTTCGGACCC   | 15 | CTGACCTTCGGACCCTA                |
|    | FGFR4 | SRY         | chr05 | 176498800 | AAATACAATAGG      | 12 | GTGTAAAATACAATAGG                |
|    | FGFR4 | SRY         | chr05 | 176504259 | GTAAACAAATGA      | 12 | GTAAACAAATGAGTACT                |
| 20 | GH1   | SREBP-1a    | chr17 | 61987242  | AGTCAGGTGG        | 10 | AGTCAGGTGGCTGCCG                 |
|    | GH1   | SREBP-1a    | chr17 | 61999953  | TGCCACATGA        | 10 | CTCGTTGGACCCTTCAGTTTGCCACATGA    |
|    | GH1   | SREBP-1a    | chr17 | 62007907  | AGCCACGTGA        | 10 | GAAGCAGAGCCACGTGA                |
|    | GH1   | STAT5B      | chr17 | 62011891  | CTTCCCAGAA        | 10 | CTTCCCAGAACAGGAGG                |
|    | GH1   | STAT5A      | chr17 | 62004754  | ATAAAACAAGAAC     | 13 | ATAAAACAAGAACTTCA                |
| 21 | HRAS  | STAT3       | chr11 | 555028    | GCGGAAGC          | 8  | GCGGAAGCCGAATCT                  |
|    | HRAS  | c-Myc       | chr11 | 542288    | GTGCCACTTGGT      | 12 | GCTGAGTGCCACTTGGT                |
|    | HRAS  | c-Myc       | chr11 | 550537    | AAGCCACGTGGA      | 12 | AAGCCACGTGGAAACA                 |
|    | HRAS  | NF-Y        | chr11 | 535617    | GCCTACCATTGGCTGCG | 17 | GCCTACCATTGGCTGCG                |
|    | HRAS  | Max         | chr11 | 544933    | CCTGACCCACGTGACCC | 18 | CCTGACCCACGTGACCCT               |
| 22 | IGF1R | p53         | chr15 | 99190658  | GGACACGCCC        | 10 | GGACACGCCCCCGA                   |
|    | IGF1R | STAT1       | chr15 | 99177941  | TTCTTGGAAGTGGC    | 14 | CTTCTTGGAAGTGGCC                 |
|    | IGF1R | STAT1       | chr15 | 99201939  | GATTTCCC          | 8  | GTTTTTGGGATTTCCC                 |
|    | IGF1R | N-Myc       | chr15 | 99190720  | CGCCACGTGGTG      | 13 | CGCCACGTGGTGAG                   |

|    |       |             |       |           |                    |    |                                 |
|----|-------|-------------|-------|-----------|--------------------|----|---------------------------------|
|    | IGF1R | N-Myc       | chr15 | 99190722  | CCCACGTGGTG        | 11 | AGCCGCCCACGTGGTG                |
| 23 | KIT   | Sp1         | chr04 | 55519363  | GGAGGCGGAGCT       | 12 | GAGGAATGGCGTGAACCCGGGAGGCGGAGCT |
|    | KIT   | AP-2gamma   | chr04 | 55523921  | CTCCTCCCGGCG       | 12 | CTCCTCCCGGCGGGCA                |
|    | KIT   | p53         | chr04 | 55521107  | AGACATGGCC         | 10 | AGACATGGCCAATCAGC               |
|    | KIT   | GATA-2      | chr04 | 55515663  | TACCCATCTCC        | 11 | TACCCATCTCCAGAGTC               |
|    | KIT   | GATA-2      | chr04 | 55525335  | GGATAAGCCC         | 10 | GGAGATGGCGTGGAAC                |
| 24 | MCC   | Pax-2       | chr05 | 112622925 | ACACAAACCC         | 10 | ACACAAACCCCTCTCTC               |
|    | MCC   | Pbx1a       | chr05 | 112620680 | AACCATCAATCAAGGG   | 16 | GAACCATCAATCAAGGG               |
|    | MCC   | Pbx1a       | chr05 | 112626525 | TGATTTGCCTGATGTT   | 16 | TGATTTGCCTGATGTTGA              |
|    | MCC   | Pbx1a       | chr05 | 112626076 | TAAGTTGATTGCTTTG   | 16 | TAAGTTGATTGCTTTGTAC             |
|    | MCC   | POU2F1      | chr05 | 112631707 | AACTATTTGCATAT     | 14 | AACTATTTGCATATAACG              |
|    | MCC   | POU2F1      | chr05 | 112630437 | CCCCCATTACCAG      | 14 | CCCCCATTACCAGGA                 |
|    | MCC   | Oct-B1      | chr05 | 112629316 | ACACATTTGCATAG     | 14 | GCTCACACATTTGCATAG              |
|    | MCC   | c-Myb       | chr05 | 112629827 | AGCCAGTTCAG        | 11 | TCAAGCCAGTTCAGGTC               |
| 25 | MDM2  | p53         | chr12 | 69202750  | CTGACTTGTCT        | 11 | TAAGTCCTGACTTGTCT               |
|    | MDM2  | STAT1       | chr12 | 69188515  | TTCTGAGAAATGTG     | 14 | TTCTGAGAAATGTGTGCTTAGGTGA       |
|    | MDM2  | STAT1       | chr12 | 69202950  | GATTTC             | 8  | GATTTCAGTTTTTCATCG              |
|    | MDM2  | p300        | chr12 | 69188832  | TCAGTGAGTGAGTG     | 14 | TCAGTGAGTGAGTGGTGAATC           |
|    | MDM2  | GATA-3      | chr12 | 69188062  | GAGATAGAG          | 9  | GAGATAGAGGGGTTAGGAC             |
| 26 | MET   | p53         | chr07 | 116320299 | AGACATGCCT         | 10 | TTTGTTTAGACATGCCT               |
|    | MET   | GR          | chr07 | 116293524 | AGGAACTCTGTGTTATGT | 18 | AGGAACTCTGTGTTATGTT             |
|    | MET   | GR          | chr07 | 116316547 | CATGACACTCTGTTCTAT | 18 | CATGACACTCTGTTCTAT              |
|    | MET   | Sp1         | chr07 | 116312089 | TGGGCGGGGC         | 10 | TGTCGTGGGCGGGGC                 |
|    | MET   | NF-1        | chr07 | 116297072 | CATGGCAGGAAGCCAGA  | 17 | CATGGCAGGAAGCCAGAT              |
| 27 | MYC   | ITF-2       | chr08 | 128742193 | TGGGGACATATGTTGTC  | 17 | TGGGGACATATGTTGTC               |
|    | MYC   | NF-kappaB   | chr08 | 128735610 | TGGAATTCCCC        | 11 | ATCCTTGGAATTCCCC                |
|    | MYC   | Pax-4a      | chr08 | 128751480 | TGTCTCCACCCC       | 13 | CGTTTGTCTCCACCCC                |
|    | MYC   | NF-AT       | chr08 | 128739805 | AGTTTTTCCAATG      | 13 | ACAGTTTTTCCAATGCC               |
|    | MYC   | PPAR-gamma2 | chr08 | 128746310 | CTGACCCCCGCCCTCGTT | 18 | CTGACCCCCGCCCTCGTT              |
| 28 | NF2   | p53         | chr22 | 29984474  | AGGCATGCGC         | 10 | AGGCATGCGCCATCCAT               |

|    |      |            |       |           |                     |    |                                                    |
|----|------|------------|-------|-----------|---------------------|----|----------------------------------------------------|
|    | NF2  | STAT3      | chr22 | 29984227  | GGCTTCCC            | 8  | CACATGGCGGCTGGCTTCCC                               |
|    | NF2  | c-Fos      | chr22 | 29979932  | GGTGACGCAC          | 10 | ATGGCATGGTGACGCAC                                  |
|    | NF2  | c-Jun      | chr22 | 29979652  | TGAGGTCA            | 8  | GGAATCACCTGAGGTCAGGGGTTCGA                         |
|    | NF2  | AP-1       | chr22 | 29992559  | GGTGACTCAT          | 10 | GAGCTGGGTGACTCAT                                   |
| 29 | NME1 | p53        | chr17 | 49222669  | AGACTGGGCTGGGCATGGT | 19 | AGACTGGGCTGGGCATGGTGA                              |
|    | NME1 | p53        | chr17 | 49225595  | AGCCATGCCT          | 10 | ATGAATACAGCCATGCCT                                 |
|    | NME1 | NF-kappaB  | chr17 | 49226667  | TGGGCAATTTCCC       | 13 | TGGGCAATTTCCCCTCTC                                 |
|    | NME1 | AP-1       | chr17 | 49212823  | AGTGGCTCAC          | 10 | TTTTCAGCCAGGCTCAGTGGCTCAC                          |
|    | NME1 | c-Jun      | chr17 | 49211358  | TGACCTCA            | 8  | TGACCTCAGGTGATCTGCCAGTCTCGGCCTCG                   |
| 30 | NRAS | p53        | chr01 | 115262392 | AGGGCATGCC          | 10 | AGGGCATGCCACACCT                                   |
|    | NRAS | C/EBPalpha | chr01 | 115251157 | TACATCACCACAC       | 13 | GTTACATCACCACACAT                                  |
|    | NRAS | c-Fos      | chr01 | 115276659 | TCTAAGTCAC          | 10 | TCTAAGTCACCTTAAAT                                  |
|    | NRAS | AP-1       | chr01 | 115261942 | ATGAATCAG           | 9  | CGGCATTATGAATCAG                                   |
|    | NRAS | MyoD       | chr01 | 115254085 | GGTGGTGGACG         | 11 | AAAAAATTAGTCAGGCATGGTGGTGGACG                      |
|    | NRAS | NF-1       | chr01 | 115250501 | TCTGGTCAGACAGCCAA   | 17 | TCTGGTCAGACAGCCAA                                  |
| 31 | PGR  | Sp1        | chr11 | 100999042 | CGGCTCCTCCTC        | 12 | AGCCGCGGCTCCTCCTC                                  |
|    | PGR  | p53        | chr11 | 101009115 | GAGGCATTTC          | 10 | GAGGCATTTCCTTCTATA                                 |
|    | PGR  | c-Myb      | chr11 | 100997784 | GCCCCAACTCGCCGCGC   | 18 | GCCCCAACTCGCCGCGC                                  |
|    | PGR  | TBP        | chr11 | 100991516 | TTTTTTAAAG          | 10 | ACATTTTCATTTTTTAAAG                                |
|    | PGR  | CHOP-10    | chr11 | 100993321 | GGAATGCAATGGGC      | 14 | GGAATGCAATGGGCTAT                                  |
| 32 | PHB  | STAT3      | chr17 | 47502290  | ATCGATCTCGGTCTTAAAC | 19 | ATCGATCTCGGTCTTAAAC                                |
|    | PHB  | Brachyury  | chr17 | 47489173  | AAAGATGACAGCTCTG    | 16 | AAAGATGACAGCTCTGTGCCCAGCATCCACT                    |
|    | PHB  | STAT5A     | chr17 | 47489502  | TATTTCCAGGAAT       | 13 | TATTTCCAGGAATCATCT                                 |
|    | PHB  | STAT5A     | chr17 | 47494783  | ACGAAGGATGTTT       | 13 | TATCACGAAGGATGTTT                                  |
|    | PHB  | p53        | chr17 | 47509587  | TGGGGATGCC          | 10 | CGCTAATGGGGATGCC                                   |
| 33 | PLG  | NF-kappaB  | chr06 | 161127476 | GGGGGCTTCAC         | 11 | ACCCAGGGGGCTTCAC                                   |
|    | PLG  | Sp1        | chr06 | 161110973 | GGAGGTGGGGTG        | 12 | CACACGGGAGGTGGGGTG                                 |
|    | PLG  | Egr-1      | chr06 | 161104377 | TGTGTGGGAGT         | 11 | TGTGTGGGAGTCTAAGTCTCTTTGTAGGTCACTCAGGACTTGCTTTATAA |
|    | PLG  | AP-1       | chr06 | 161107158 | GCTGATTCA           | 9  | GCTGATTCAATGCCTAT                                  |

|    |       |             |       |           |                     |    |                                      |
|----|-------|-------------|-------|-----------|---------------------|----|--------------------------------------|
|    | PLG   | c-Jun       | chr06 | 161104403 | GGTCACTCAG          | 10 | GGTCACTCAGGACTTGCTTTATAAATCTGGGTGCTT |
| 34 | PLAT  | AP-1        | chr08 | 42072895  | ATTTTAGTCACC        | 12 | TCTGATTTTAGTCACC                     |
|    | PLAT  | NF-kappaB   | chr08 | 42064525  | GAAGTAAGTCCCC       | 13 | GGAAGTAAGTCCCC                       |
|    | PLAT  | GR          | chr08 | 42056746  | ACAGAACTGTTTATAA    | 16 | ACAGAACTGTTTATAAC                    |
|    | PLAT  | IRF-2       | chr08 | 42059466  | GGGTTTCTCTTTT       | 13 | CAACGGGTTTCTCTTTT                    |
|    | PLAT  | CREB        | chr08 | 42058131  | GCTGCAGTG           | 9  | GGCCTGAGCCTGGGAGTTTGAGGCTGCAGTG      |
| 35 | PRL   | C/EBPalpha  | chr06 | 22293381  | CTATACCTTACCAAGTT   | 17 | CTATACCTTACCAAGTT                    |
|    | PRL   | AP-1        | chr06 | 22290964  | TCTGACTCA           | 9  | TCTGACTCATGAGAAATAG                  |
|    | PRL   | c-Jun       | chr06 | 22298075  | AACTGCAG            | 8  | AACTGCAGTCACTTGCG                    |
|    | PRL   | FOXO1       | chr06 | 22293119  | TGTTGTTTAC          | 10 | AATTCCTTGTTGTTTAC                    |
|    | PRL   | STAT5B      | chr06 | 22293464  | CAATTTTAGGAAA       | 13 | GGCACACAATTTTAGGAAA                  |
| 36 | PTH   | E4BP4       | chr11 | 13514310  | TACTTACTTAACA       | 13 | TACTTACTTAACAGATT                    |
|    | PTH   | c-Fos       | chr11 | 13521454  | AGACGCAGTG          | 10 | AATAGACGCAGTGGCT                     |
|    | PTH   | IRF-1       | chr11 | 13507612  | GTGAAAGGTAAAA       | 13 | AAAGTGAAAGGTAAAACTC                  |
|    | PTH   | C/EBPbeta   | chr11 | 13511158  | CTCAACACTTTG        | 12 | CTCAACACTTTGGGAGGGG                  |
|    | PTH   | aMEF-2      | chr11 | 13510354  | CATCTTAAAATAAGTTT   | 17 | CATCTTAAAATAAGTTTGG                  |
| 37 | PTPRF | CREB        | chr01 | 43986943  | GGTGATGTC           | 9  | GGTGATGTCTGCTGCCT                    |
|    | PTPRF | Max1        | chr01 | 43980196  | GACCACATGTCC        | 12 | GACCACATGTCCCTTG                     |
|    | PTPRF | GR          | chr01 | 43983481  | TGAGCCACTGTGTCCGTC  | 18 | TGAGCCACTGTGTCCGTCT                  |
|    | PTPRF | GR-beta     | chr01 | 44005443  | TGGAGCCCTCTGTCCTCT  | 18 | TGGAGCCCTCTGTCCTCTC                  |
|    | PTPRF | HNF-4alpha1 | chr01 | 43989065  | GAAGGGGAAAGGCCAAG   | 17 | AGAAGGGGAAAGGCCAAG                   |
| 38 | RB1   | E2F         | chr13 | 48878047  | TCATGCCGCCCAA       | 13 | TCATGCCGCCCAAAA                      |
|    | RB1   | MyoD        | chr13 | 48878395  | TTGACAGGTGTCTG      | 13 | ACTTGACAGGTGTCTG                     |
|    | RB1   | E2F-4       | chr13 | 48877861  | TTTTCCCGC           | 9  | TGACGTTTTCCCGC                       |
|    | RB1   | YY1         | chr13 | 48869988  | TGGCTGCCATCCTGGACCC | 19 | TGGCTGCCATCCTGGACCC                  |
|    | RB1   | ATF-2       | chr13 | 48877835  | ACGTGACGCCGCG       | 13 | ACGTGACGCCGCGG                       |
| 39 | SNCG  | AP-1        | chr10 | 88719062  | CCAATGACTCAGCT      | 14 | CCAATGACTCAGCTCTG                    |
|    | SNCG  | Sp1         | chr10 | 88717632  | CGAGGTGGGGCC        | 12 | CGAGGTGGGGCCACAG                     |
|    | SNCG  | Sp1         | chr10 | 88718095  | TGGGCAGGGC          | 10 | TGGGCAGGGCAGTAAAT                    |
|    | SNCG  | Sp1         | chr10 | 88718679  | GGGGGCGAGGCC        | 12 | GGGGGCGAGGCCCTGG                     |



|    |        |                                 |       |          |                     |    |                                      |
|----|--------|---------------------------------|-------|----------|---------------------|----|--------------------------------------|
|    | SNCG   | Sp1                             | chr10 | 88720307 | TGGGCGGGGC          | 10 | TGGGCGGGGCAGCTGCC                    |
| 40 | SRC    | STAT3                           | chr20 | 35962565 | GGCTTCCC            | 8  | GGCTTCCCGACTAGT                      |
|    | SRC    | AP-1                            | chr20 | 35956199 | TGAATGAATCACCC      | 14 | CTGTGAATGAATCACCC                    |
|    | SRC    | NF-kappaB1<br>AP-2alpha isoform | chr20 | 35960516 | TGGGGATCCCT         | 11 | TGGGGATCCCTGCCTCCG                   |
|    | SRC    | 4                               | chr20 | 35975107 | GCCCCGGGG           | 9  | AGGGGCCCCGGGGTCAG                    |
|    | SRC    | STAT1                           | chr20 | 35953855 | TTCTGGGAAGTGGG      | 14 | TTCTGGGAAGTGGGTTG                    |
| 41 | TFAP2C | AP-2alphaA                      | chr20 | 55189297 | AGCCCCCAGGCC        | 12 | AGCCCCCAGGCCCTAAA                    |
|    | TFAP2C | AP-2alphaA                      | chr20 | 55200469 | ACGCCTGGAGGCG       | 13 | ACGCCTGGAGGCGAC                      |
|    | TFAP2C | AP-2alphaA                      | chr20 | 55202326 | CGCTCCCAGGCG        | 12 | AGACGCTCCCAGGCG                      |
|    | TFAP2C | AP-2alphaA                      | chr20 | 55205375 | TGCCCCGAGGCC        | 12 | TGCCCCGAGGCCCGGGC                    |
|    | TFAP2C | N-Myc                           | chr20 | 55192015 | GCCACGTGGCT         | 11 | ACAGCCACGTGGCTCCC                    |
| 42 | TGFA   | NF-kappaB1                      | chr2  | 70776933 | AAGAAAAGTCCCC       | 13 | CTATAAGAAAAGTCCCC                    |
|    | TGFA   |                                 | chr2  | 70780673 | CCGGACAGTCCCC       | 13 | GACCGACAGTCCCC                       |
|    | TGFA   |                                 | chr2  | 70782497 | AGGGGTCCCC          | 10 | AGGGGTCCCCCACCT                      |
|    | TGFA   |                                 | chr2  | 70785769 | GGGAAAGTCCT         | 11 | GCCCCTGGGAAAGTCCT                    |
|    | TGFA   |                                 | chr2  | 70786492 | AGGGAAGGACCCC       | 13 | AGGGAAGGACCCCCG                      |
|    | TGFA   |                                 | chr2  | 70794995 | AAAGAAAATCCCC       | 13 | AAAGAAAATCCCCTAAACA                  |
| 43 | TGFA   | NF-kappaB                       | chr2  | 70773652 | CTGGAGTGCAGTGG      | 14 | AGGGCCAGGCTGGAGTGCAGTGG              |
|    | TGFA   | NF-kappaB                       | chr2  | 70787960 | GAGACATGCC          | 10 | GAGACATGCCACCTTG                     |
|    | TGFA   | p53                             | chr2  | 70794296 | CACCATGGCAGGGCCTTCC | 19 | CACCATGGCAGGGCCTTCC                  |
|    | TGFA   | FOXD1                           | chr2  | 70792412 | TCCCCTGTTTACTTTGG   | 17 | TCCCCTGTTTACTTTGG                    |
|    | TGFA   | FOXF2                           | chr2  | 70792586 | TCCCTTGTTTACTATGT   | 17 | TCCCTTGTTTACTATGT                    |
|    | TGFA   | RFX1                            | chr2  | 70776888 | TATGTTGCCACAGTAACAG | 19 | TATGTTGCCACAGTAACAG                  |
|    | TGFA   | FOXO3b                          | chr2  | 70792586 | TCCCTTGTTTACTAT     | 15 | TCCCTTGTTTACTATGT                    |
| 44 | TP53   | p53                             | chr17 | 7578504  | AGGGCAGGTCT         | 11 | AGGGCAGGTCTTGCCAGT                   |
|    | TP53   | p53                             | chr17 | 7592715  | AGGGATGCCC          | 10 | TCTAGGAGAGGGATGCCC                   |
|    | TP53   | p53                             | chr17 | 7603194  | AGGCATGCACTACCATGCC | 19 | AGGCATGCACTACCATGCCAGCTAATTTTTTTTTTC |
|    | TP53   | p53                             | chr17 | 7606362  | GGACACGGACGGGCCTGGC | 19 | GGACACGGACGGGCCTGGC                  |
|    | TP53   | NF-kappaB                       | chr17 | 7590848  | GGGGAAAACCCCA       | 13 | GGGGAAAACCCCAATCC                    |

|    |        |             |       |          |                    |    |                                                    |
|----|--------|-------------|-------|----------|--------------------|----|----------------------------------------------------|
| 45 | TP53   | NF-kappaB   | chr17 | 7607641  | AGAGGAATGTCACCC    | 15 | AGAGGAATGTCACCCCTG                                 |
|    | TP53   | E2F         | chr17 | 7572967  | TTATGGCGGGAGG      | 13 | TTATGGCGGGAGGTA                                    |
|    | TP53   | E2F         | chr17 | 7578450  | CATGGCGCGGACGCGG   | 16 | CATGGCGCGGACGCGG                                   |
|    | TP53   | AhR         | chr17 | 7589736  | GTTGCAGGCGACCCGCGG | 18 | GTTGCAGGCGACCCGCGG                                 |
|    | TP53   | AhR         | chr17 | 7606300  | CTCTCTCGCAGGACCGGG | 18 | CTCTCTCGCAGGACCGGG                                 |
|    | TSG101 | HOXA9B      | chr11 | 18541113 | TTGACAGTTTCACGT    | 15 | TTGACAGTTTCACGTAC                                  |
|    | TSG101 | GR-beta     | chr11 | 18561399 | AGGTCTTGTATGTCATGT | 18 | AGGTCTTGTATGTCATGT                                 |
|    | TSG101 | GR-alpha    | chr11 | 18539812 | GCAGAACTGATTGCCC   | 16 | GCAGAACTGATTGCCC                                   |
|    | TSG101 | GR-alpha    | chr11 | 18557485 | CATCCTGACCAACATG   | 16 | TGGTCAGGAGATCAAGACCATCCTGACCAACATG                 |
|    | TSG101 | GR-alpha    | chr11 | 18561400 | GGTCTTGTATGTCATG   | 16 | GGTCTTGTATGTCATG                                   |
| 46 | TSG101 | SRY         | chr11 | 18555909 | TCTTATTGTTTAC      | 13 | TCTTATTGTTTACAATA                                  |
|    | TSG101 | FOXF2       | chr11 | 18555910 | CTTATTGTTTACAATAC  | 17 | CTTATTGTTTACAATAC                                  |
|    | TSG101 | p53         | chr11 | 18565471 | AAGGCATGTA         | 10 | AAGGCATGTATCTAGG                                   |
|    | VIM    | c-Myb       | chr10 | 17258492 | GCTAACTGCC         | 10 | TTAATTGCTAACTGCC                                   |
|    | VIM    | c-Myb       | chr10 | 17272364 | GGGGAAGGCGGTGGAGGG | 18 | GGGGAAGGCGGTGGAGGGA                                |
|    | VIM    | AP-1        | chr10 | 17257390 | GTCATGACTCATTG     | 14 | GTCATGACTCATTGCC                                   |
|    | VIM    | AP-1        | chr10 | 17258358 | CATGAGTCAC         | 10 | CATGAGTCACCAAACT                                   |
|    | VIM    | c-Jun       | chr10 | 17268982 | ATAGTGAGTCAGTC     | 14 | ATAGTGAGTCAGTCAGCA                                 |
|    | VIM    | c-Jun       | chr10 | 17270535 | CCGGTGACTAAGCG     | 14 | CCGGTGACTAAGCG                                     |
|    | VIM    | MyoD        | chr10 | 17254926 | AGCACCTGCT         | 10 | CCAAAGAAGCACCTGCT                                  |
| 47 | VIM    | MyoD        | chr10 | 17269446 | ACCCCCTGCC         | 10 | TGCAGTACCCCCTGCC                                   |
|    | VIM    | MyoD        | chr10 | 17271896 | CGGCAGGTGGA        | 11 | CGGCAGGTGGACCAGCT                                  |
|    | VIM    | MyoD        | chr10 | 17276770 | AGACAGGTGCA        | 11 | ACCGGAGACAGGTGCA                                   |
|    | VIM    | Nkx2-2      | chr10 | 17273557 | CACAAGTATTT        | 11 | CACAAGTATTTGCTAAC                                  |
|    | VIM    | Nkx2-2      | chr10 | 17279346 | TTCAAGTGCCT        | 11 | TTCAAGTGCCTTTCTGC                                  |
|    | WNT10B | C/EBPalpha  | chr12 | 49364119 | CTCATTGCTTAGAGC    | 15 | CTCATTGCTTAGAGCCC                                  |
|    | WNT10B | C/EBPalpha  | chr12 | 49367508 | ACACCCATTGCCTAATA  | 17 | ACACCCATTGCCTAATA                                  |
|    | WNT10B | PPAR-gamma1 | chr12 | 49357239 | TAGTAGAGACGGGGTT   | 16 | CGCAGGCGCCCGCCACCACGCCTGGCTAATTTTTTTTTGTATTTTTAGTA |
|    | WNT10B | PPAR-gamma1 | chr12 | 49361981 | CTCACCCTGCCCCTTC   | 16 | CTCACCCTGCCCCTCCAGC                                |
|    | WNT10B | PPAR-gamma1 | chr12 | 49371708 | CTCCCCCTTTTCCTTC   | 16 | GTCTCCCCCTTTTCCTTC                                 |

|        |        |       |          |           |   |                  |
|--------|--------|-------|----------|-----------|---|------------------|
| WNT10B | E2F    | chr12 | 49366397 | GTTAGGCGC | 9 | ACGGGTTAGGCGC    |
| WNT10B | GATA-3 | chr12 | 49363169 | CCCCATCT  | 9 | CCCCATCTCTGGGCTG |

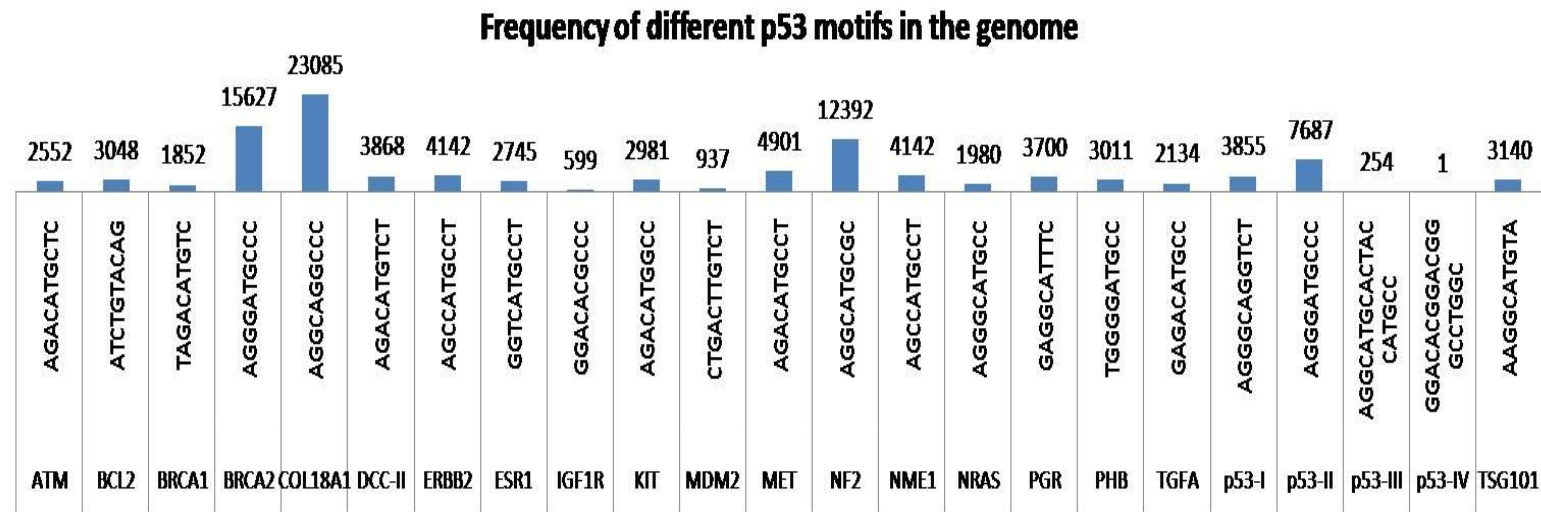

**Fig. S2.** Frequency of total occurrences of the 27, p53 binding motifs (from Table 1) present in 20 of its target genes in the human genome. It is evident that each decamer motif is repeated thousands of the time in the genome as predicted by USP programme. This result is predicted by GeneFreq programme of USP.

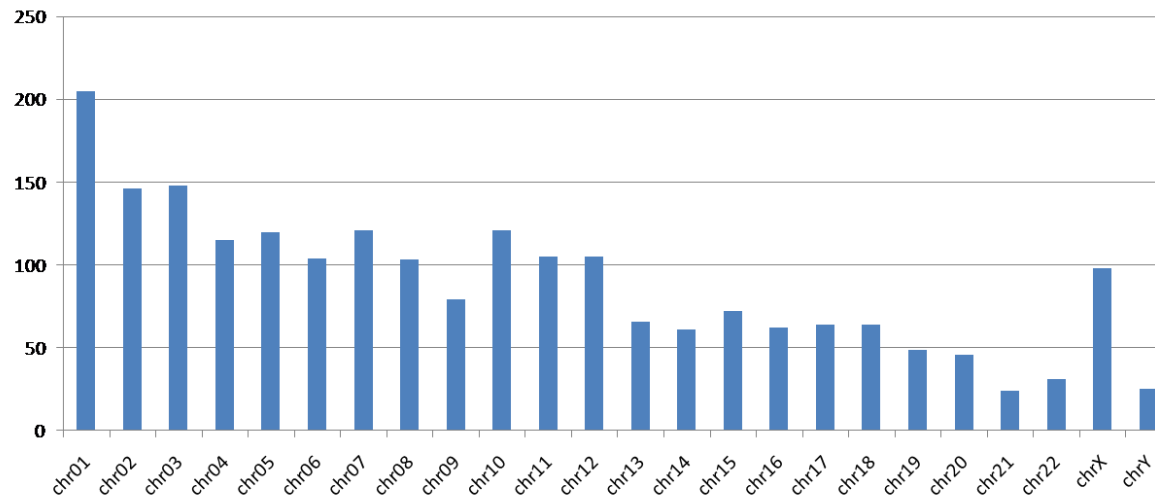

**Fig. S3**

Here, the distribution of the 4112 ERB-B2 p53 motif, predicted by Frequency Counter (GeneFreq), in the Human genome is shown on each chromosome. Clearly each human chromosome has multiple binding motifs for the p53 motif present in ERB-B2 gene. This highlights the problems in targeting the p53 motif of ERB-B2 gene which may result in the drug binding to all these positions and creating undesired effects. This emphasizes the need for targeting locus specific unique sequence for p53 motif in the ERB-B2 gene.

**Table S4.** A comparison of the melting temperatures ( $T_m$ ) of different p53REs.

| Unique motif sequence ( $n$ )                    | $T_m$ ( $n$ ) | $T_m$ ( $n-1$ ) | $T_m$ ( $n-2$ ) |
|--------------------------------------------------|---------------|-----------------|-----------------|
| AGACATGCTCAAGTTCT (17)                           | 61.33         | 60.04           | 58.64           |
| ATCTGTACAGACCTTAT (17)                           | 59.17         | 58.2            | 58.64           |
| TAGACATGTCTTTTCTTCCC (20)                        | <b>61.79</b>  | 59.41           | 56.82           |
| AGGGATGCCCTACCCC (16)                            | <b>70.6</b>   | 68.44           | 66.05           |
| AGGCAGGCCCTCGGCA (16)                            | 74.28         | 74.32           | 71.3            |
| GAGCCTTCCTTGGCATTTC <u>A</u>                     | 66.2          | 65.6            | 64.58           |
| AGACATGTCTTTGGCAC (17)                           | <b>63.06</b>  | 60.95           | 60.11           |
| GAGCAAGTCCTGCCATGTT <u>A</u>                     | 66.94         | 67.54           | 67.85           |
| AGCCATGCCTGCGCA (15)                             | 70.4          | 70.25           | 66.79           |
| GGTCATGCCTGTAATCCCAGCACGTTGGGAGGCTGAG<br>GT (39) | 84.14         | 83.42           | 82.48           |
| GGACACGCCCCCGA (15)                              | 73.83         | 73.4            | 71.88           |
| AGACATGGCCAATCAGC (17)                           | <b>65.65</b>  | 62.33           | 61.09           |
| CTGACTTGTCTCCAGCTG (18)                          | 64.99         | 64.36           | 63.25           |

|                                              |              |       |       |
|----------------------------------------------|--------------|-------|-------|
| AGACATGCCTAATTTTTAT (19)                     | 57.09        | 56    | 56.14 |
| AGGCATGCGCCATCCAT (17)                       | 69.98        | 69.68 | 69.42 |
| AGACTGGGCTGGGCATGGT                          | 73.34        | 71.93 | 69.98 |
| AGCCATGCCTTTTCCCCAT (19)                     | 68.31        | 67.85 | 67.38 |
| AAAAAGAGAGGGCATGCC                           | <b>64.58</b> | 62.19 | 58.66 |
| GAGGCATTTCTTCTATA (17)                       | 56.57        | 56.82 | 56.82 |
| TGGGATGCCCAGAGT (16)                         | <b>68.76</b> | 66.97 | 66.05 |
| GAGACATGCCCACCTTG (17)                       | 66.09        | 65.55 | 65.99 |
| CACCATGGCAGGGCCTTCC                          | <b>72.57</b> | 70.7  | 69.98 |
| AGGGCAGGTCTTGGCC (16)                        | <b>70.6</b>  | 68.44 | 65    |
| AGGGATGCCCCAGAGCT (17)                       | 71.27        | 70.6  | 67.46 |
| AGGCATGCACTACCATGCCCAGCTAATTTTTTTTTC<br>(36) | 74.96        | 74.38 | 74.43 |
| GGACACGGACGGGCCTGGC (19)                     | <b>77.98</b> | 75.6  | 73.87 |
| AAGGCATGTATCTAGG (16)                        | <b>59.58</b> | 56.68 | 55.03 |

**Fig. S5.**

Major groove (upper panel) and Minor groove dimensions (lower panel) of different p53 motifs do not reveal any common DNA geometry. p53-DNA complexes, for which crystal structures are available, were analysed by 3DNA programme to extract major and minor groove dimensions.

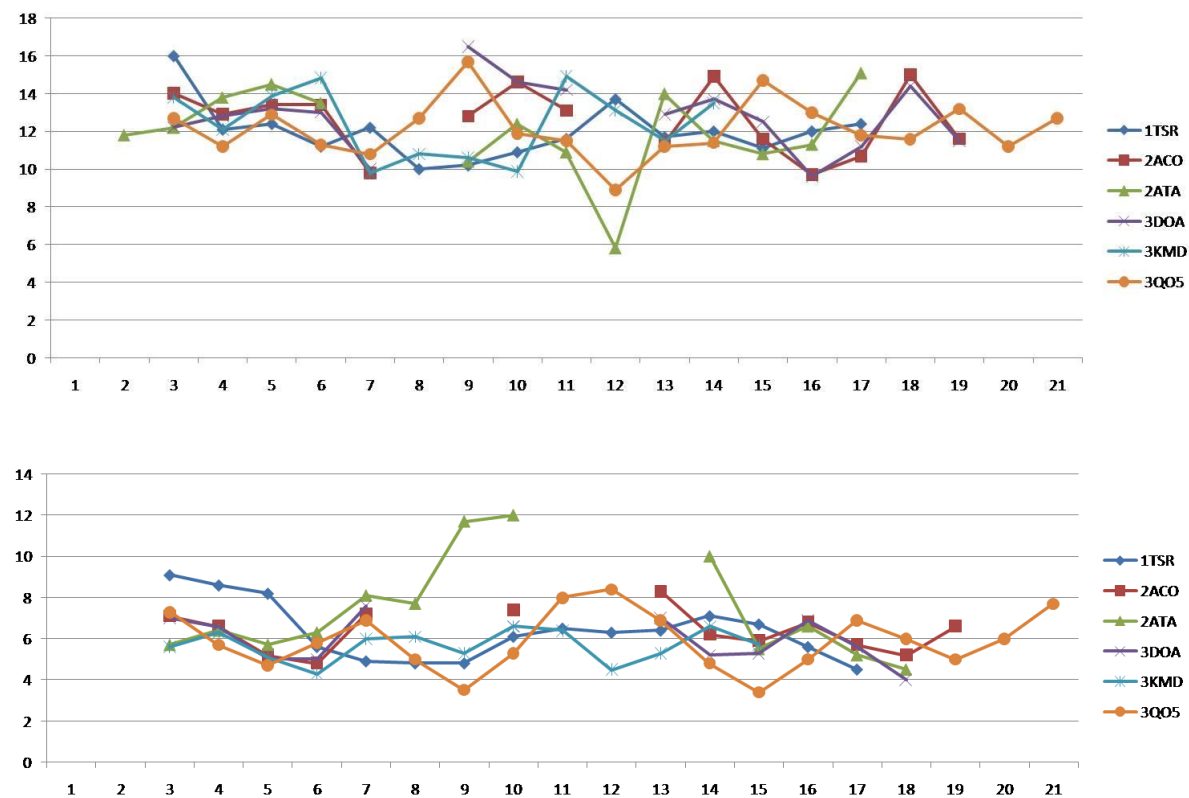

Supplement: baw116_Supplementary_Data.zip [file baw116_Supplementary_Data.zip]
